# Supplementary material
Source: Springer Nature journal article supplement (https://www.springermedizin.de/resource/supplementary/12958_2009_594_MOESM5_ESM.pdf/9568054)

Nodal

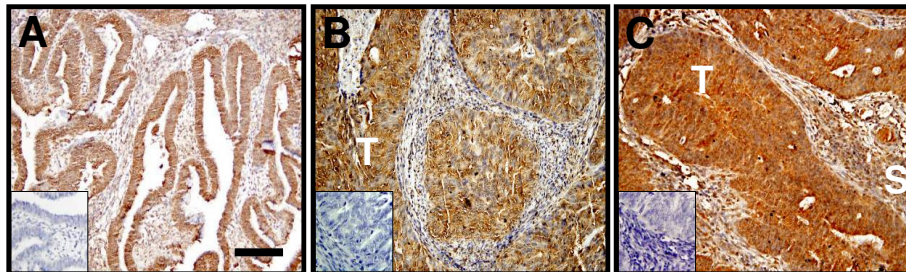

D

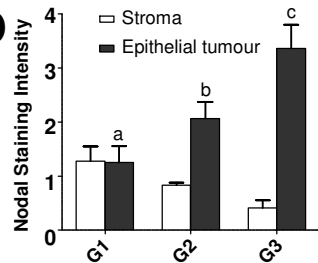

Cripto

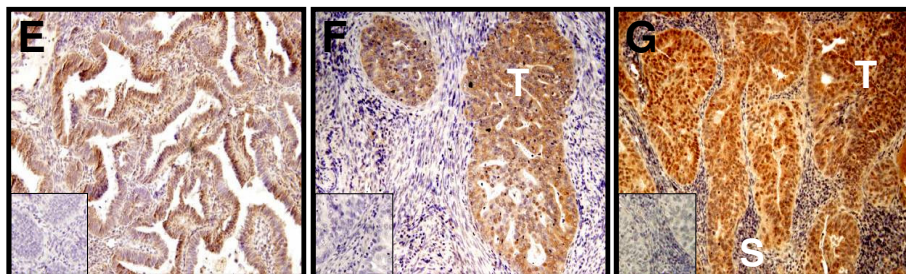

H

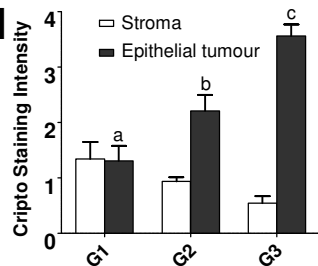

Lefty

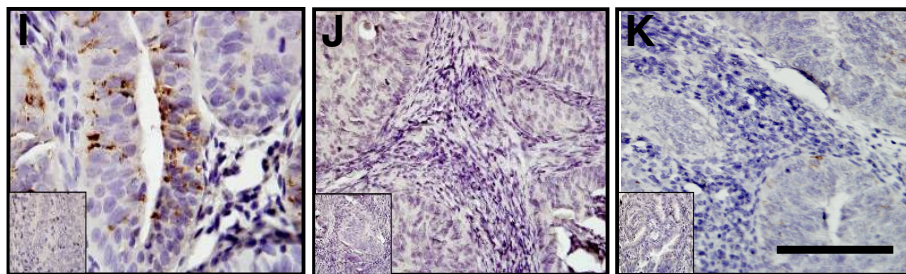

L

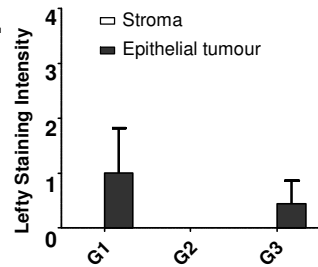

Grade 1

Grade 2

Grade 3

Supplement: MOESM5 [file 9568054]
